# Supplementary material
Source: ML conference proceedings conference paper supplement (https://openaccess.thecvf.com/content/CVPR2024/html/Cheng_Transfer_CLIP_for_CVPR_2024_paper.html)
Supplement: Supplementary file [file Cheng_Transfer_CLIP_for_CVPR_2024_supplemental.pdf]

# Transfer CLIP for Generalizable Image Denoising

## Supplementary Material

**Algorithm 1** Extract dense features from CLIP ResNet.

```

# PyTorch code of CLIP ResNet image encoder
# the forward function
def forward(self, x):
    out = [] # store multi-scale dense features
    x = x.type(self.conv1.weight.dtype)
    x = self.relu1(self.bn1(self.conv1(x)))
    x = self.relu2(self.bn2(self.conv2(x)))
    x = self.relu3(self.bn3(self.conv3(x)))
    out.append(x) # scale-1 F1
    x = self.avgpool(x)
    x = self.layer1(x); out.append(x) # scale-2 F2
    x = self.layer2(x); out.append(x) # scale-3 F3
    x = self.layer3(x); out.append(x) # scale-4 F4
    x = self.layer4(x); out.append(x) # scale-5 F5
    x = self.attnpool(x)
    return out

```

## 7. More Analyses of CLIP ResNet Encoder

We conduct more feature analysis of CLIP frozen ResNet encoder for the image *Lena* using Poisson noise and CKA similarity measure, respectively, and report the results in Fig. 9 and 10. Besides, feature similarity analysis of CLIP ResNet encoder for the image *flowers* from Set14 is also performed and shown in Fig. 11.

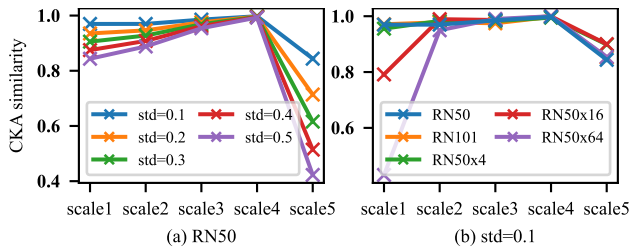

Figure 9. Feature similarity analysis of the CLIP ResNet encoder under *i.i.d.* Gaussian noise with varying levels and CKA similarity measure

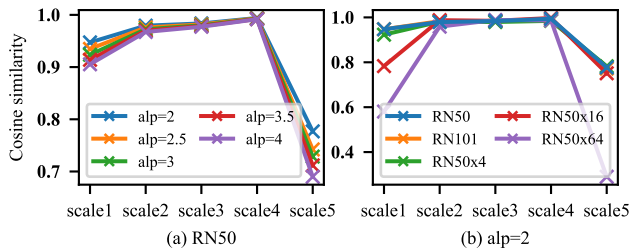

Figure 10. Feature similarity analysis of the CLIP ResNet image encoder under Poisson noise with varying levels and cosine similarity measure

## 8. More Implementation Details

We present the details of our learnable decoder in Fig. 12.

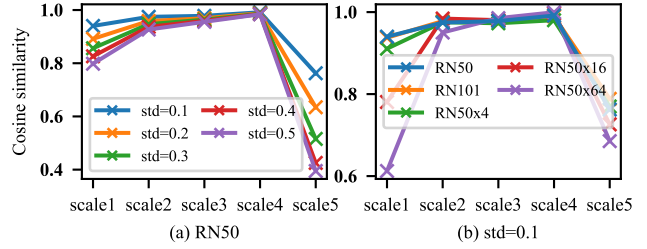

Figure 11. Feature similarity analysis for the image *flowers* from set14 under Gaussian noise and cosine similarity measure

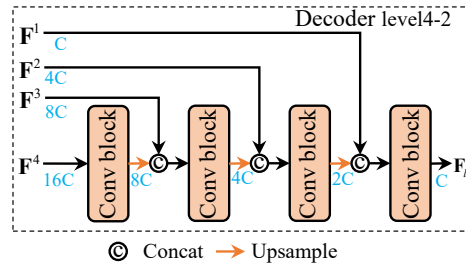

Figure 12. The detail of the learnable decoder (level-4 to -2) in our CLIPDenoising. The symbols with lightblue represent the channel number, where  $C$  is the base channel and is 64 in RN50

## 9. More experimental results

### 9.1. Model size and inference time

We provide the model size, inference time, and FLOPs of compared methods in Table 6. Note that the frozen RN50 (excluding the last layer) in our model has 8.5M parameters, and the learnable decoder has 11M parameters. And HAT uses the DnCNN model.

Table 6. Efficiency comparisons (test on size  $3 \times 512 \times 512$ )

|               | DnCNN       | Restormer | MaskDeno. | HAT         | DIL   | ours         |
|---------------|-------------|-----------|-----------|-------------|-------|--------------|
| Params(M)     | <b>0.67</b> | 26.1      | 0.88      | <b>0.67</b> | 16.6  | 19.5         |
| Infer.time(s) | 0.034       | 0.415     | 2.239     | 0.034       | 0.867 | <b>0.018</b> |
| FLOPs(G)      | 176.1       | 564.0     | 204.9     | 176.1       | 4360  | <b>83.58</b> |

### 9.2. Results on environmental noise

We consider image deraining task. We use Rain100L as the training set and use *Rain12*, *Rain drop (S)*, and *Rain and mist (S)* as OOD test sets. Results in Table 7 imply that our model exhibits better generalization capability than PromptIR (NeurIPS 2023), a recent image restoration model.

### 9.3. Results of using CLIP ViT image encoder

We incorporate CLIP ViT-B/16 image encoder into our model and report the resultant results in Table 8. Specifically, the model ex-

Table 7. Results on image deraining tasks (PSNR/SSIM)

|          | <i>Rain12</i>      | <i>Rain drop (S)</i> | <i>Rain and mist (S)</i> |
|----------|--------------------|----------------------|--------------------------|
| PromptIR | 35.00/0.944        | 22.98/0.835          | 21.89/0.673              |
| ours     | <b>35.11/0.953</b> | <b>23.66/0.838</b>   | <b>28.56/0.869</b>       |

tracts features from the middle (i.e., 7-th) layer of the frozen ViT-B/16, and then feeds it to 4 learnable ViT blocks and 4 learnable upsampling blocks that upsample the deep features back to the original image space. By comparing Table 8 and Tables 1, 9, our model with image ViT encoder shows inferior in-distribution and OOD performance.

Table 8. Results of using CLIP ViT-B/16 image encoder

|         | Gauss(15)   | Gauss(50)   | Poisson(3.5) | Speckle(0.04) |
|---------|-------------|-------------|--------------|---------------|
| McM     | 33.28/0.903 | 21.29/0.372 | 24.78/0.618  | 27.41/0.755   |
| Kodak24 | 33.98/0.914 | 20.59/0.338 | 24.02/0.529  | 28.08/0.741   |

## 10. Experiments on MoCo-v3 ResNet50

We conduct the feature similarity analysis of frozen MoCo-v3 ResNet50 for the image *Lena* using *i.i.d.* Gaussian noise and cosine similarity measure, and report the result in Fig. 13. Five multi-scale features show robustness to noise. Subsequently, we substitute the RN50 of CLIP with the RN50 of MoCo-v3 in our denoiser and perform the model training and OOD experiments. As observed in Table 10, frozen MoCo-v3 RN50-powered deep denoiser exhibits a certain level of generalization ability compared with DnCNN and our method.

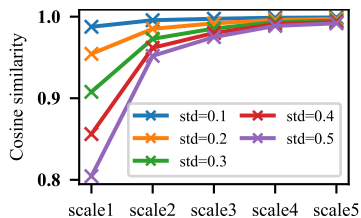

Figure 13. Feature similarity analysis of the MoCo-v3 ResNet50 under Gaussian noise. Cosine similarity is utilized here

Table 9. Additional quantitative comparison of different methods on CBSD68, McMaster, Kodak24 and Urban100 datasets with regard to diverse synthetic OOD noises. The best results are highlighted in **bold** and the second best is underlined. Note that *multiple noise levels* are required by HAT and DIL during the training to achieve generalization, while our method only needs *one noise level* for training

| Noise Types                     | Datasets | DnCNN [62]         | Restormer [60]     | MaskDenoising [6]  | HAT [58]           | DIL [32]           | Ours               |
|---------------------------------|----------|--------------------|--------------------|--------------------|--------------------|--------------------|--------------------|
| Gauss<br>$\sigma = 15$          | CBSD68   | <u>33.78/0.931</u> | <b>34.42/0.936</b> | 30.99/0.888        | 33.22/0.912        | 32.50/0.906        | <u>33.97/0.930</u> |
|                                 | McMaster | <u>34.03/0.914</u> | <b>35.61/0.935</b> | 30.85/0.832        | 33.04/0.883        | 32.45/0.853        | <u>33.86/0.910</u> |
|                                 | Kodak24  | <u>34.59/0.924</u> | <b>35.49/0.931</b> | 31.79/0.884        | 33.88/0.905        | 33.37/0.912        | <u>34.69/0.922</u> |
|                                 | Urban100 | <u>32.10/0.934</u> | <b>34.57/0.955</b> | 29.50/0.899        | 32.48/0.916        | 32.15/0.920        | <u>33.15/0.930</u> |
| Gauss<br>$\sigma = 25$          | CBSD68   | 29.89/0.828        | 27.21/0.681        | 28.44/0.815        | <u>30.54/0.853</u> | 29.98/0.843        | <b>31.02/0.878</b> |
|                                 | McMaster | 30.46/0.806        | 27.31/0.633        | 28.76/0.778        | <u>30.41/0.807</u> | 30.17/0.790        | <b>31.50/0.866</b> |
|                                 | Kodak24  | 30.53/0.808        | 27.64/0.639        | 29.08/0.792        | <u>31.37/0.849</u> | 30.99/0.856        | <b>31.86/0.871</b> |
|                                 | Urban100 | 28.88/0.847        | 27.35/0.744        | 27.63/0.836        | <u>29.97/0.867</u> | 29.72/0.876        | <b>30.72/0.893</b> |
| Spatial Gauss<br>$\sigma = 45$  | CBSD68   | 28.05/0.785        | 24.51/0.668        | 28.19/0.815        | <u>28.33/0.791</u> | 26.33/0.703        | <b>29.43/0.849</b> |
|                                 | McMaster | 28.24/0.740        | 24.01/0.539        | 28.27/0.762        | 28.44/0.742        | 26.47/0.646        | <b>29.82/0.825</b> |
|                                 | Kodak24  | 28.23/0.752        | 23.66/0.609        | <u>28.85/0.805</u> | 28.44/0.760        | 26.31/0.652        | <b>30.12/0.838</b> |
|                                 | Urban100 | 27.53/0.806        | 25.80/0.722        | <u>27.34/0.837</u> | 28.32/0.809        | 26.51/0.737        | <b>29.42/0.868</b> |
| Spatial Gauss<br>$\sigma = 50$  | CBSD68   | 26.92/0.741        | 23.98/0.630        | <u>27.47/0.790</u> | 27.32/0.752        | 25.43/0.665        | <b>28.51/0.825</b> |
|                                 | McMaster | 27.16/0.693        | 24.63/0.573        | <u>27.60/0.738</u> | 27.49/0.703        | 25.61/0.609        | <b>29.10/0.803</b> |
|                                 | Kodak24  | 27.04/0.702        | 23.29/0.569        | <u>28.09/0.778</u> | 27.37/0.715        | 25.39/0.611        | <b>29.21/0.815</b> |
|                                 | Urban100 | 26.49/0.766        | 24.93/0.690        | <u>26.74/0.815</u> | 27.36/0.776        | 25.61/0.704        | <b>28.55/0.847</b> |
| Poisson<br>$\alpha = 2.5$       | CBSD68   | 28.70/0.806        | 25.63/0.693        | 27.80/0.806        | <b>30.15/0.858</b> | <u>29.53/0.870</u> | <u>29.94/0.874</u> |
|                                 | McMaster | 29.80/0.799        | 25.75/0.693        | 28.55/0.730        | <u>30.87/0.840</u> | 30.74/0.871        | <b>30.93/0.864</b> |
|                                 | Kodak24  | 29.23/0.776        | 26.06/0.644        | 28.42/0.781        | 30.90/0.843        | 30.42/0.868        | <b>30.93/0.869</b> |
|                                 | Urban100 | 27.56/0.806        | 25.14/0.719        | 26.95/0.815        | <b>29.52/0.871</b> | 29.17/0.893        | <u>29.51/0.884</u> |
| Poisson<br>$\alpha = 3$         | CBSD68   | 26.37/0.712        | 23.55/0.615        | 25.87/0.718        | 28.48/0.804        | <u>28.52/0.844</u> | <b>28.71/0.846</b> |
|                                 | McMaster | 27.49/0.720        | 23.62/0.632        | 26.13/0.667        | 29.30/0.784        | <u>29.78/0.848</u> | <b>29.82/0.843</b> |
|                                 | Kodak24  | 26.68/0.660        | 23.95/0.561        | 27.04/0.683        | 29.16/0.779        | <u>29.45/0.844</u> | <b>29.71/0.841</b> |
|                                 | Urban100 | 25.41/0.721        | 22.72/0.642        | 25.33/0.737        | 27.82/0.815        | <u>28.09/0.874</u> | <b>28.27/0.862</b> |
| Speckle<br>$\sigma^2 = 0.02$    | CBSD68   | 31.79/0.898        | 29.10/0.826        | 29.91/0.875        | <b>32.50/0.916</b> | 31.57/0.924        | <u>31.82/0.904</u> |
|                                 | McMaster | 32.74/0.886        | 28.89/0.800        | 30.47/0.809        | <b>33.11/0.899</b> | <u>32.66/0.907</u> | <u>32.28/0.870</u> |
|                                 | Kodak24  | 32.82/0.895        | 29.96/0.814        | 30.80/0.874        | <b>33.26/0.908</b> | <u>32.35/0.919</u> | <u>32.91/0.908</u> |
|                                 | Urban100 | 30.11/0.893        | 28.24/0.828        | 28.60/0.883        | <b>31.49/0.917</b> | 30.90/0.930        | <u>30.94/0.904</u> |
| Speckle<br>$\sigma^2 = 0.03$    | CBSD68   | 30.10/0.856        | 26.78/0.765        | 28.99/0.851        | <b>31.10/0.893</b> | 30.40/0.906        | <u>30.48/0.886</u> |
|                                 | McMaster | 31.21/0.846        | 26.81/0.752        | 29.70/0.778        | <b>31.95/0.873</b> | <u>31.70/0.904</u> | 31.31/0.858        |
|                                 | Kodak24  | 31.12/0.852        | 27.50/0.740        | 29.90/0.848        | <b>31.95/0.884</b> | 31.28/0.901        | <u>31.64/0.891</u> |
|                                 | Urban100 | 28.37/0.841        | 25.86/0.774        | 27.65/0.847        | <b>30.10/0.892</b> | <u>29.72/0.916</u> | 29.69/0.889        |
| Speckle<br>$\sigma^2 = 0.04$    | CBSD68   | 28.65/0.812        | 25.13/0.719        | 27.94/0.815        | <b>29.97/0.867</b> | <u>29.56/0.890</u> | <u>29.49/0.870</u> |
|                                 | McMaster | 29.69/0.804        | 25.30/0.717        | 28.68/0.736        | 30.90/0.845        | <b>30.94/0.893</b> | <u>30.47/0.845</u> |
|                                 | Kodak24  | 29.53/0.801        | 25.66/0.683        | 28.76/0.804        | <b>30.82/0.856</b> | 30.49/0.887        | <u>30.67/0.876</u> |
|                                 | Urban100 | 26.92/0.795        | 24.17/0.732        | 26.64/0.804        | <b>28.86/0.862</b> | <u>28.82/0.903</u> | <u>28.69/0.875</u> |
| Salt&Pepper<br>$\alpha = 0.012$ | CBSD68   | 28.56/0.814        | 25.88/0.779        | 30.49/0.863        | 29.31/0.846        | <u>30.81/0.865</u> | <b>31.95/0.890</b> |
|                                 | McMaster | 27.76/0.773        | 25.32/0.746        | 30.11/0.798        | 28.39/0.804        | <u>30.44/0.820</u> | <b>31.90/0.863</b> |
|                                 | Kodak24  | 29.17/0.797        | 26.17/0.751        | 31.27/0.861        | 29.91/0.834        | 31.24/0.851        | <b>32.72/0.882</b> |
|                                 | Urban100 | 27.40/0.823        | 25.73/0.815        | 29.08/0.880        | 28.60/0.851        | 30.49/0.875        | <b>31.50/0.901</b> |
| Salt&Pepper<br>$\alpha = 0.016$ | CBSD68   | 27.45/0.780        | 24.57/0.726        | <u>30.13/0.853</u> | 28.32/0.813        | 30.02/0.841        | <b>30.85/0.857</b> |
|                                 | McMaster | 26.61/0.730        | 24.00/0.687        | 29.70/0.786        | 27.37/0.763        | <u>29.75/0.793</u> | <b>30.85/0.838</b> |
|                                 | Kodak24  | 28.05/0.760        | 24.81/0.690        | <u>30.94/0.853</u> | 28.95/0.797        | 30.52/0.827        | <b>31.67/0.863</b> |
|                                 | Urban100 | 26.42/0.806        | 24.45/0.771        | 28.76/0.871        | 27.63/0.820        | <u>29.75/0.855</u> | <b>30.30/0.889</b> |

Table 10. Quantitative comparison of DnCNN, our model with frozen CLIP RN50, and our model with frozen MoCo-v3 RN50 on McMaster and Kodak24 datasets with regard to various synthetic OOD noises. All methods are trained under *i.i.d.* Gaussian noise with  $\sigma = 15$ . Progressive feature augmentation is not used here.

|                   | McMaster | Gauss $\sigma = 50$ | Spatial Gauss $\sigma = 55$ | Poisson $\alpha = 3.5$ | Speckle $\sigma^2 = 0.04$ | S&P $d = 0.02$     |
|-------------------|----------|---------------------|-----------------------------|------------------------|---------------------------|--------------------|
| DnCNN             |          | 20.18/0.312         | 26.18/0.649                 | 25.50/0.651            | 29.69/0.804               | 25.72/0.691        |
| Ours+CLIP RN50    |          | <b>26.95/0.698</b>  | <b>28.24/0.771</b>          | <b>28.82/0.814</b>     | <b>30.29/0.824</b>        | <u>29.62/0.795</u> |
| Ours+MoCo-v3 RN50 |          | <u>24.85/0.625</u>  | <u>27.36/0.748</u>          | <u>26.92/0.747</u>     | 29.68/0.823               | <b>29.96/0.809</b> |
|                   | Kodak24  | Gauss $\sigma = 50$ | Spatial Gauss $\sigma = 55$ | Poisson $\alpha = 3.5$ | Speckle $\sigma^2 = 0.04$ | S&P $d = 0.02$     |
| DnCNN             |          | 19.78/0.301         | 25.98/0.653                 | 24.49/0.560            | 29.53/0.801               | 27.10/0.723        |
| Ours+CLIP RN50    |          | <b>26.87/0.692</b>  | <b>28.19/0.781</b>          | <b>29.74/0.840</b>     | <b>30.60/0.871</b>        | <u>30.52/0.832</u> |
| Ours+MoCo-v3 RN50 |          | <u>25.59/0.630</u>  | <u>27.72/0.747</u>          | <u>26.82/0.718</u>     | 29.90/0.829               | <b>30.95/0.834</b> |



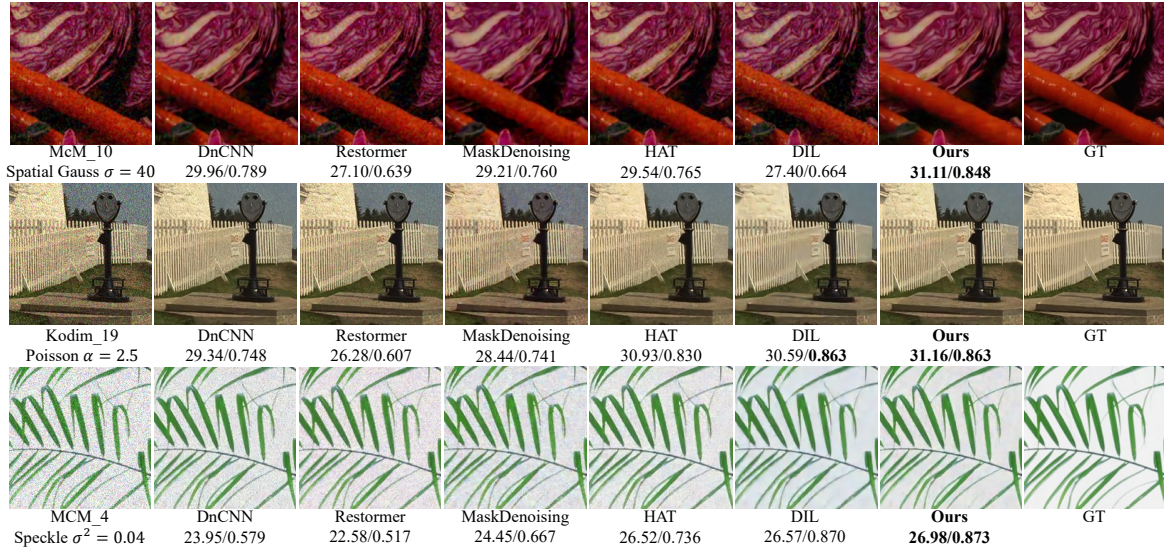

Figure 14. More qualitative denoising results on synthetic OOD noise.

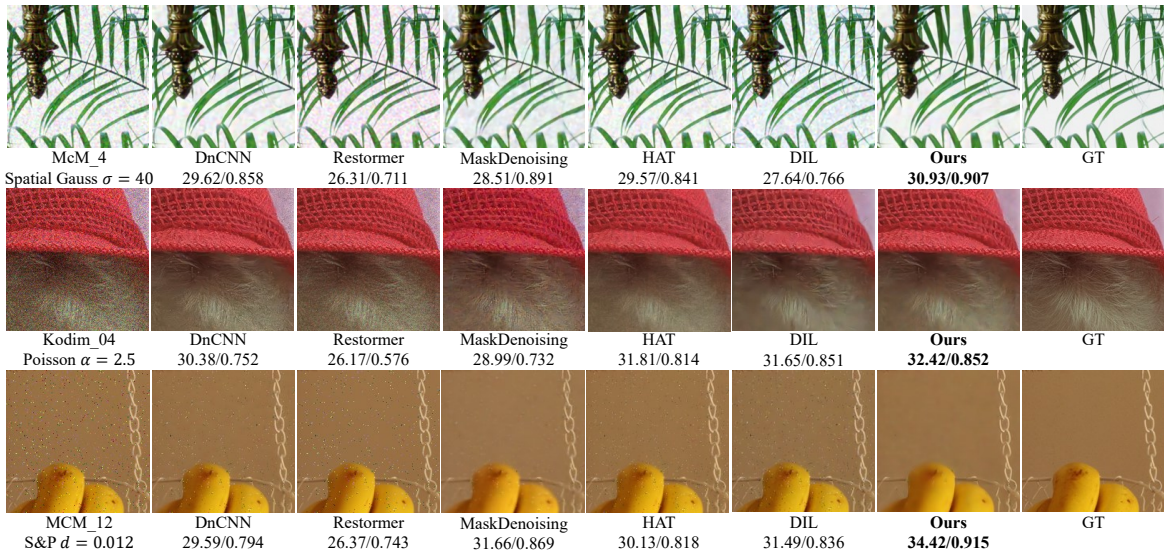

Figure 15. More qualitative denoising results on synthetic OOD noise.

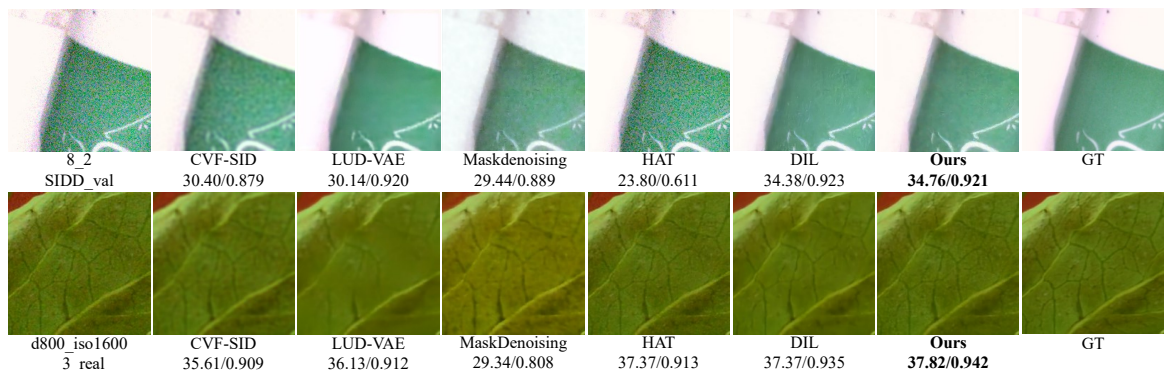

Figure 16. More qualitative denoising results on real-world sRGB noise
